# Supplementary material for: Transcriptome data are insufficient to control false discoveries in regulatory network inference
Source: PubMed Central journal article supplement — Cell Syst. Author manuscript; Available in PMC 2024 Dec 13. (PMC11642480; doi:10.1016/j.cels.2024.07.006), 2024-08-21
Supplement: NIHMS2018891-supplement-MMC1.pdf [file NIHMS2018891-supplement-MMC1.pdf]

**Cell Systems, Volume 15**

**Supplemental information**

**Transcriptome data are insufficient to control  
false discoveries in regulatory network inference**

**Eric Kernfeld, Rebecca Keener, Patrick Cahan, and Alexis Battle**

# Supplemental Information for “Transcriptome data is insufficient to control false discoveries in regulatory network inference”

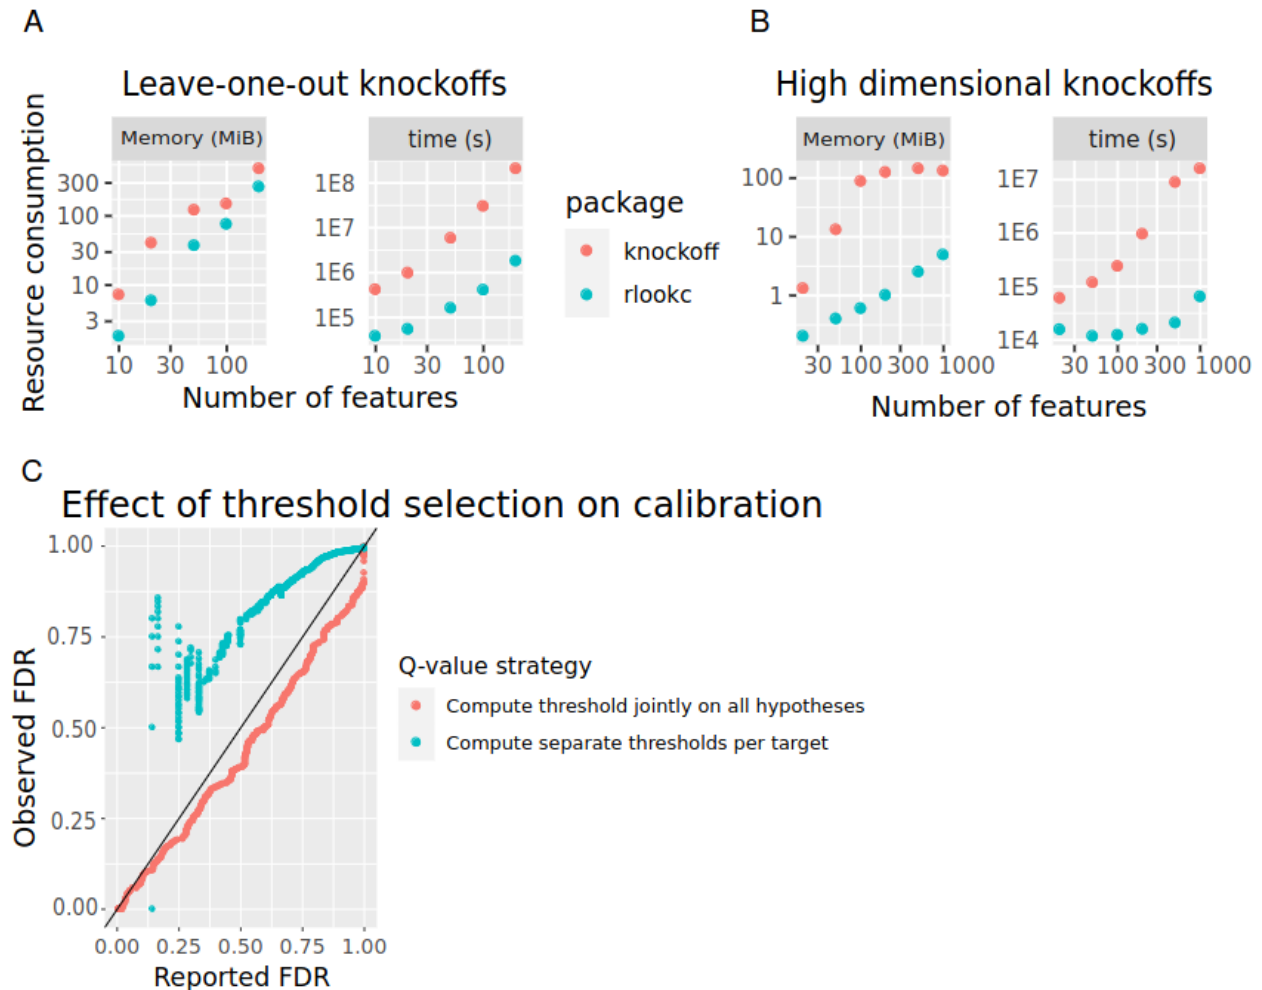

**Figure S1. Knockoff construction for transcriptome-scale data.** Related to Figure 1. **A)** Runtime and memory consumption for leave-one-out Gaussian knockoff construction with  $n=1000$  observations using rlookc (our method) and the reference implementation in the R package “knockoff”, with the method indicated by the color.

**B)** Runtime and memory consumption for high-dimensional Gaussian knockoff construction with  $n=10$  observations using `rlookc` (our method) and the reference implementation in the R package “knockoff”, with the method indicated by the color.

**C)** Threshold selection. Reported FDR from knockoff filter (x-axis) versus observed FDR (y-axis) in a simulated variable selection problem with 805 observations, 334 features, and 334 response variables. One trend line shows FDR when separate thresholds are selected for each target and the other shows FDR when a single threshold is used across all targets, with the threshold selection method indicated by color.

A

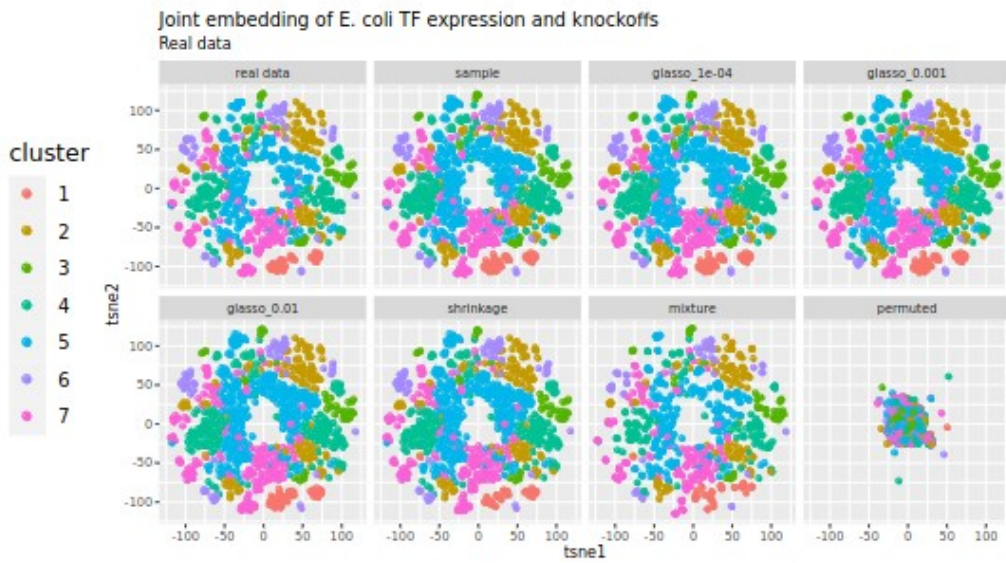

B

Gold standard power to verify prior findings

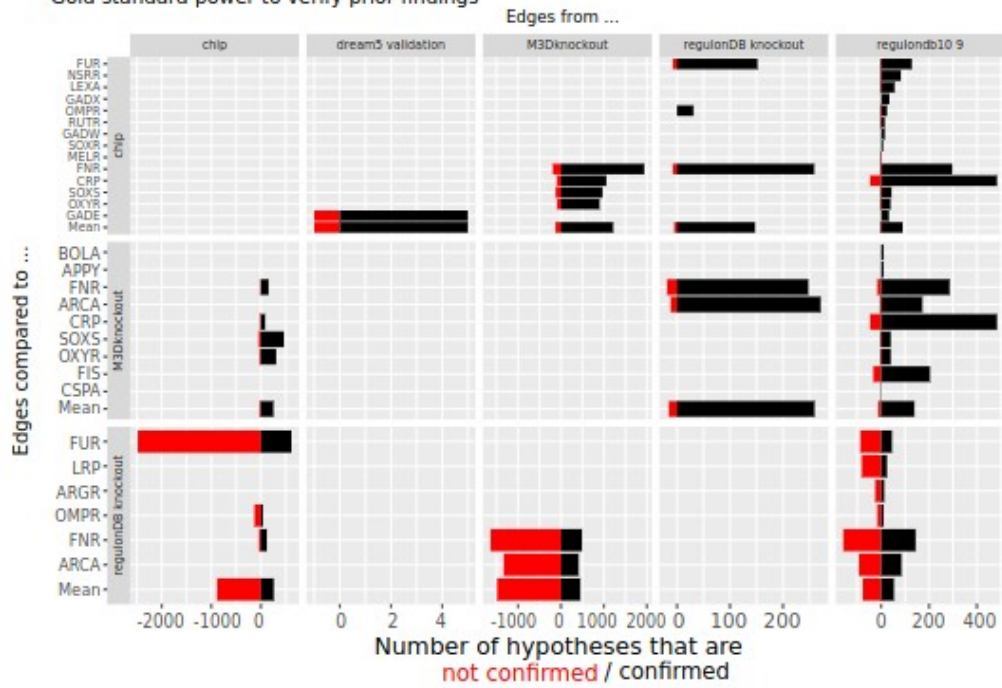

C

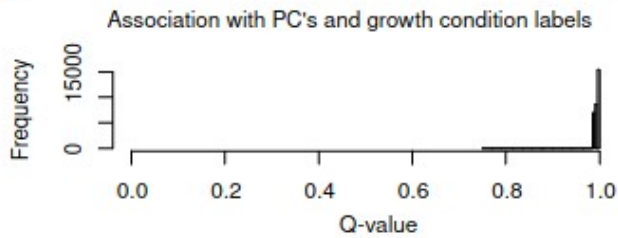

D

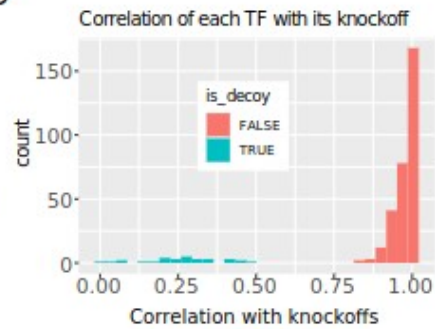

**Figure S2. Technical characteristics of knockoff construction on the *E. coli* TF expression dataset.** Related to Figure 3.

**A)** T-SNE embeddings of *E. coli* TF expression and corresponding knockoff features. Samples are colored based on k-means cluster assignments, which were trained on the TF features. Figure is based on n=805 microarray profiles.

**B)** Comparison of gold standards. Hypotheses are extracted from the gold standard labeled in the top margin and checked to see if they are supported by the gold standard labeled in the left-hand margin. Hypotheses are omitted if they cannot be checked by the gold standard on the left, for instance if it is based on ChIP or knockout data and the regulator was never ChIPped or knocked out. Color indicates confirmed versus unconfirmed hypotheses.

**C)** Q-values for testing of conditional independence between each TF and each of the principal components or perturbation indicators that was explicitly conditioned on in Fig. 5b. The knockoff generation method is "glasso\_1E-04". Figure is based on n=805 microarray profiles.

**D)** Correlation distribution between variables and their knockoff copies. Gaussian knockoffs were generated for the 805 by 332 matrix of *E. coli* TF expression using the sample covariance matrix. Color indicates whether the variable is a real gene or a decoy.
